# Supplementary material for: CO2reduction using paper-derived carbon electrodes modified with copper nanoparticles
Source: Royal Society of Chemistry journal article supplement (doi:10.1039/c9ra07430a), 2019-01-01
Supplement: c9ra07430a1.pdf [file c9ra07430a1.pdf]

**Supplementary information for**

**CO<sub>2</sub> Reduction Using Paper-Derived Carbon Electrodes**

**Modified with Copper Nanoparticles**

Federico J. V. Gomez, George Chumanov, Maria Fernanda Silva and Carlos D. Garcia

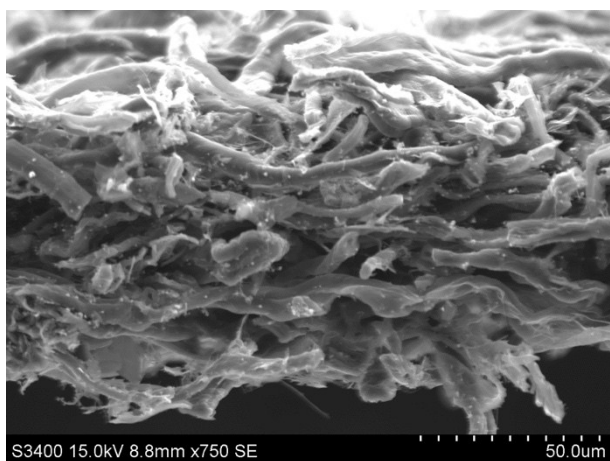

**Figure S1:** Cross section of a pyrolyzed paper modified with CuSO<sub>4</sub>

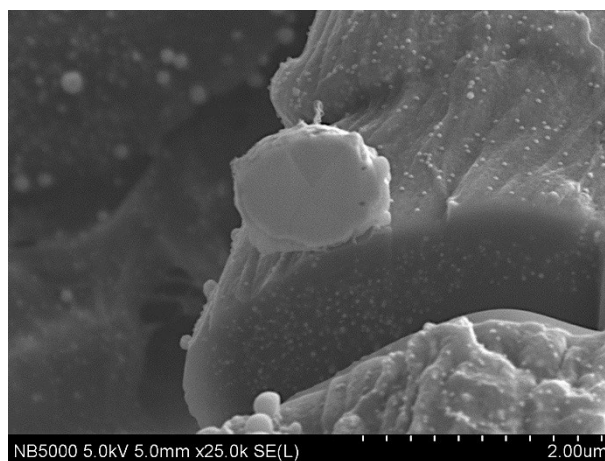

**Figure S2:** Cross-section of single fiber of a paper-derived carbon electrode modified with CuSO<sub>4</sub> showing the presence of CuNP inside the fibers.

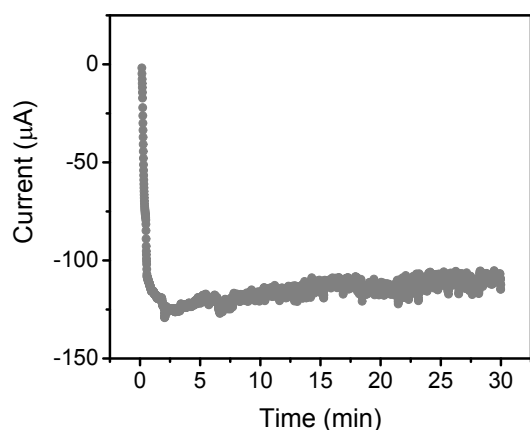

**Figure S3:** Representative example of the *i*-*t* curves obtained during the electrolysis experiment performed in a stirred, CO<sub>2</sub>-saturated solution containing 0.5 M NaHCO<sub>3</sub> and while applying -1.5 V (vs Ag|AgCl|KCl<sub>sat</sub>).
